# Supplementary material for: A Systematic Review of the Guidelines and Delphi Study for the Multifactorial Fall Risk Assessment of Community-Dwelling Elderly
Source: MDPI journal article supplement (doi:10.3390/ijerph17176097), 2020-08-21
Supplement: s1 [file s1]

## Supplementary S1

**Table S1.** Search term

| <b>Ovid-MEDLINE, Cochrane Library</b> |                                                                                      |
|---------------------------------------|--------------------------------------------------------------------------------------|
| 1                                     | (senior* or elder* or old* or older or ag*ing or old-age*).tw.                       |
| 2                                     | exp Aged/                                                                            |
| 3                                     | or/1-2                                                                               |
| 4                                     | (fall or Falls or faller* or falling or fell or slip\$ or stumble\$ or tumble\$).mp. |
| 5                                     | Accidental Falls/                                                                    |
| 6                                     | or/4-5                                                                               |
| 7                                     | assessment*.mp.                                                                      |
| 8                                     | Geriatric Assessment/                                                                |
| 9                                     | Needs Assessment/                                                                    |
| 10                                    | exp Risk Assessment/                                                                 |
| 11                                    | Self-Assessment/                                                                     |
| 12                                    | or/7-11                                                                              |
| 13                                    | evaluation*.mp.                                                                      |
| 14                                    | Evaluation Studies/                                                                  |
| 15                                    | or/13-14                                                                             |
| 16                                    | guide*.mp.                                                                           |
| 17                                    | exp Guideline                                                                        |
| 18                                    | or/16-17                                                                             |
| 19                                    | (multifactorial or multifacted).mp.                                                  |
| 20                                    | 6 and (12 or 15 or 18) and 19                                                        |
| 21                                    | and/3, 20                                                                            |
| <b>EMBASE</b>                         |                                                                                      |
| 1                                     | (senior* or elder* or old* or ag*ing or old-age*).mp.                                |
| 2                                     | exp Aged/                                                                            |
| 3                                     | or/1-2                                                                               |
| 4                                     | (fall* or fell or slip* or stumble* or tumble*).mp.                                  |
| 5                                     | Falling/                                                                             |
| 6                                     | Fall Risk/                                                                           |
| 7                                     | Home Accident/                                                                       |
| 8                                     | or/4-7                                                                               |
| 9                                     | assessment*.mp.                                                                      |
| 10                                    | Fall Risk Assessment/                                                                |
| 11                                    | Community Assessment/                                                                |
| 12                                    | Risk Assessment/                                                                     |
| 13                                    | Geriatric Assessment/                                                                |
| 14                                    | or/9-13                                                                              |
| 15                                    | evaluation*.mp.                                                                      |
| 16                                    | Evaluation Study/                                                                    |
| 17                                    | Self-Evaluation/                                                                     |
| 18                                    | or/15-17                                                                             |
| 19                                    | guide*                                                                               |
| 20                                    | exp Practice Guideline/                                                              |
| 21                                    | or/19-20                                                                             |
| 22                                    | (multifactorial or multifaceted).mp.                                                 |
| 23                                    | 8 and (14 or 18 or 21) and 22                                                        |
| 24                                    | and/3, 23                                                                            |
| <b>TriP database</b>                  |                                                                                      |

|                                                                                     |                                                                     |
|-------------------------------------------------------------------------------------|---------------------------------------------------------------------|
| 1                                                                                   | elderly or older or aged or elder or old-age                        |
| 2                                                                                   | falls and (assessment or evaluation or guideline or multifactorial) |
| 3                                                                                   | and/1-2                                                             |
| <b>Guideline International Network, National Guideline Clearing House, WHO, CDC</b> |                                                                     |
| 1                                                                                   | falls                                                               |

Notes: WHO= World Health Organization. HSE= Health Service Executive. CDC= Centers for Disease Control and Prevention. RISS= Research Information Sharing Service. KISS= Korean Studies Information Service. KM base= Korean Medical Database

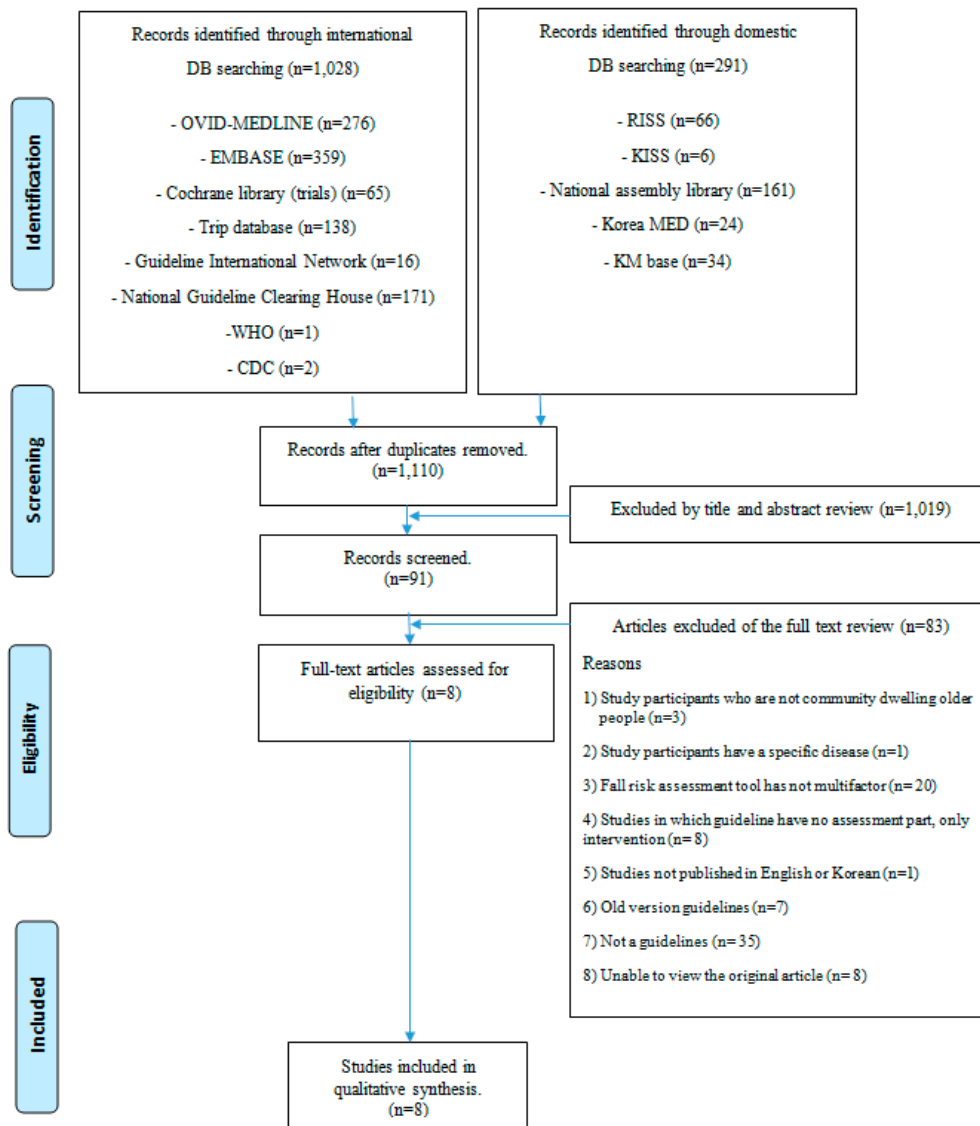

Figure S1. Previous flow chart
